# Supplementary material for: Study of flux crystal growth peculiarities, structure and Raman spectra of double (Mn,Ni)3BO5 and triple (Mn,Ni,Cu)3BO5 oxyborates with ludwigite structure
Source: Royal Society of Chemistry journal article supplement (doi:10.1039/d1ce00750e), 2021-01-01
Supplement: d1ce00750e1.pdf [file d1ce00750e1.pdf]

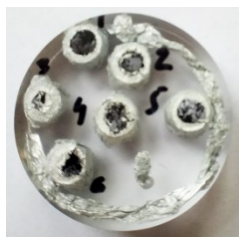

Fig. S1  $(\text{Mn,Ni,Cu})_3\text{BO}_5$  and  $(\text{Mn,Ni})_3\text{BO}_5$  samples with different composition, molded into plastic and mechanically polished for EDX analysis.

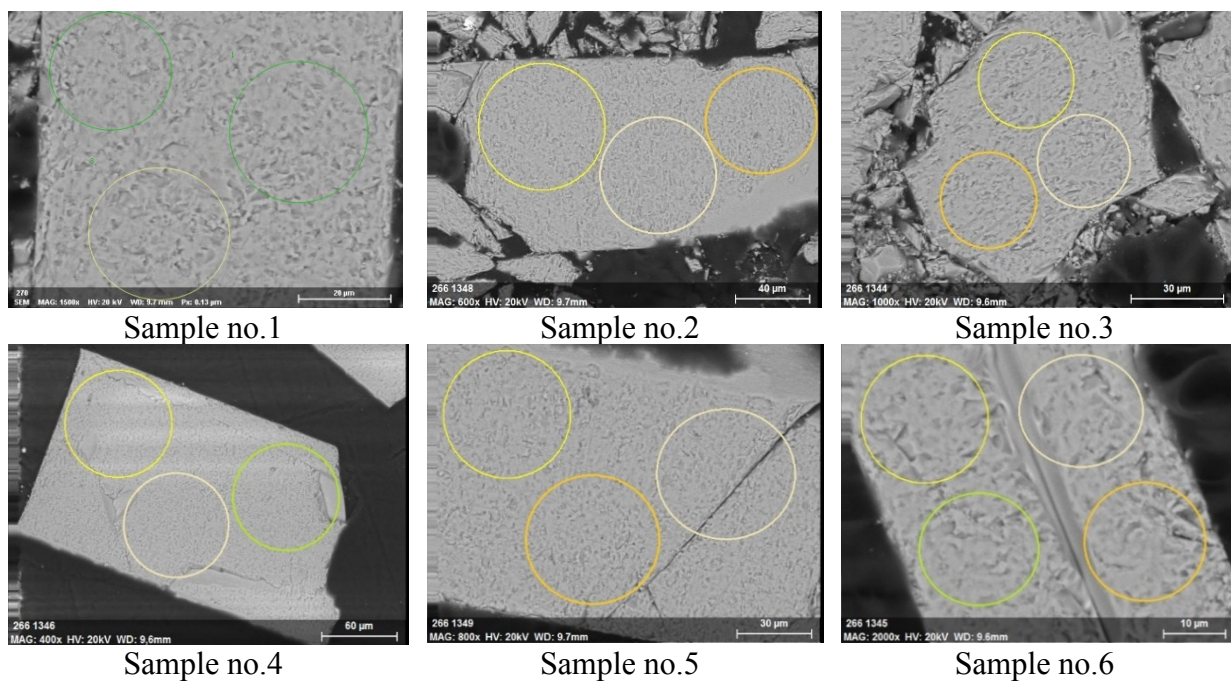

Fig. S2 The studied crystals. The circles show the sections chosen to analyze the spectra.

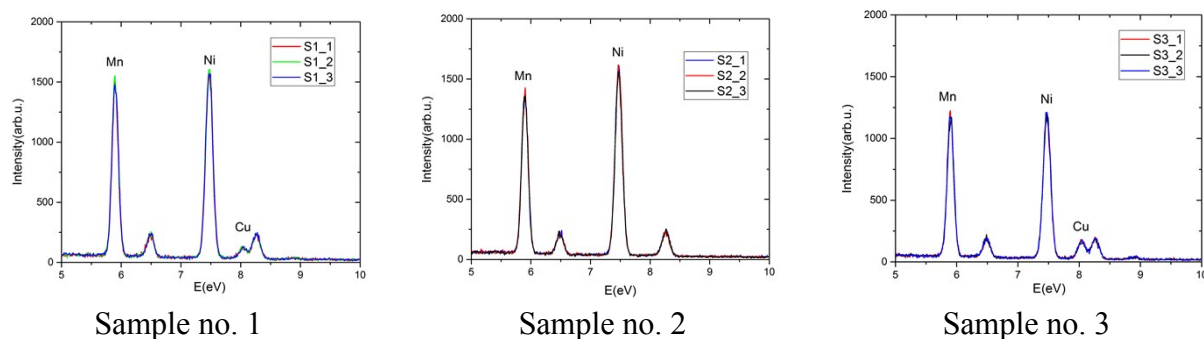

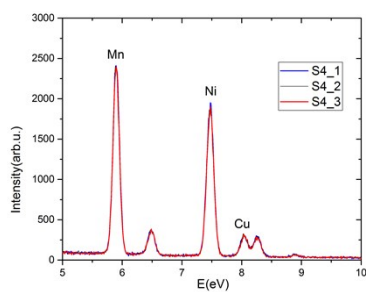

Sample no. 4

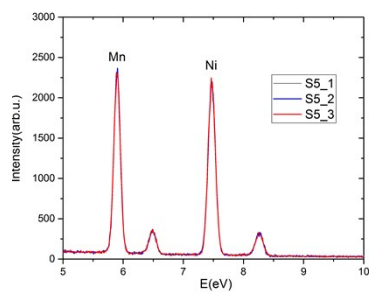

Sample no. 5

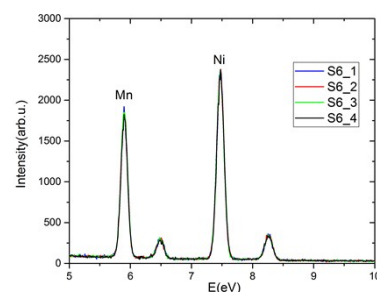

Sample no. 6

Fig. S3 The EDX spectra of the different sections (Fig. S2) of crystal samples.

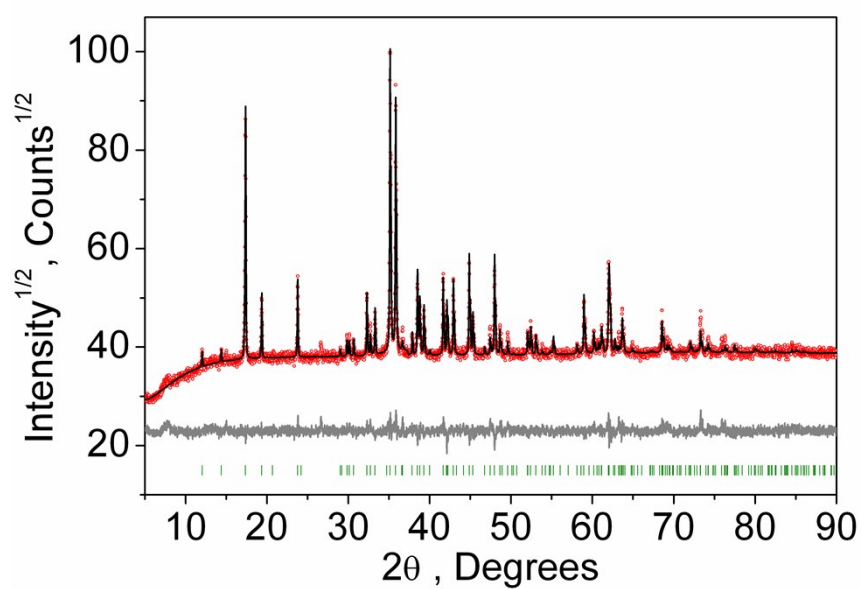

(a)

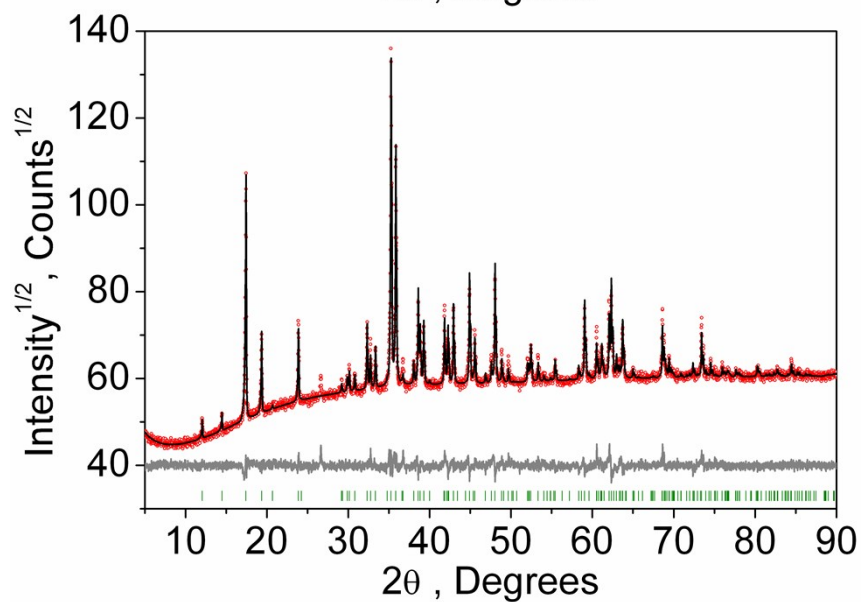

(b)

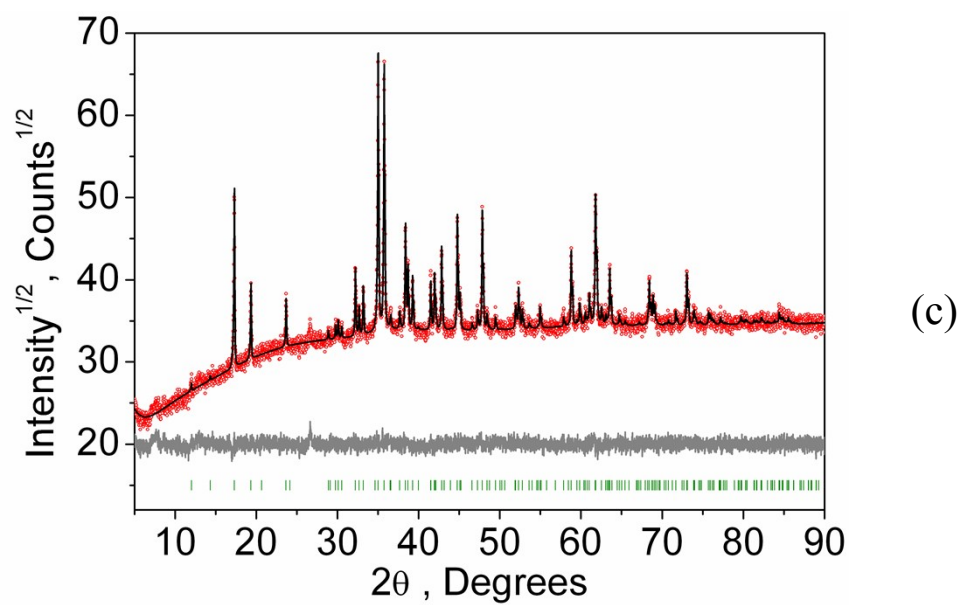

Fig. S4 Powder X-ray diffraction patterns of  $\text{Mn}_{3-x}\text{Ni}_x\text{BO}_5$ : a –  $x = 0.5$ ; b –  $x = 1.8$ ; c –  $x = 2.13$ ;
